# Supplementary material
Source: Springer Nature journal article supplement (https://www.springermedizin.de/resource/supplementary/13075_2012_4027_MOESM4_ESM.pdf/9695864)

# Study OSM104972 Part II B Results, Synovial Fluid and Serum, Free and Total OSM: Subject 36505

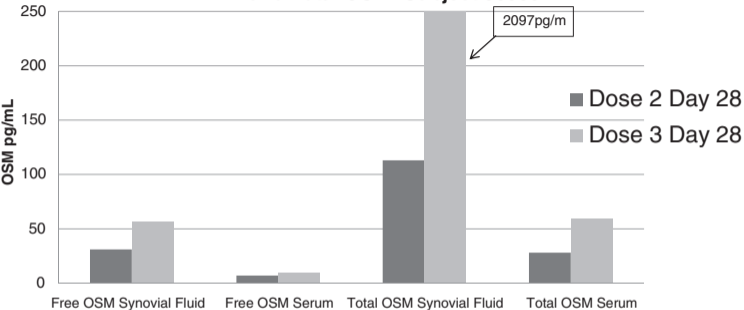

## Subject 36505 PK Data

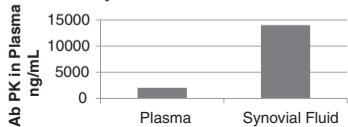

Supplement: MOESM4 [file 9695864]
